# Supplementary material for: Individual and interaction effects of monounsaturated fatty acids on their associations with hypertension in Chinese residents
Source: Royal Society of Chemistry journal article supplement (doi:10.1039/d4fo01410c), 2024-01-01
Supplement: d4fo01410c1.pdf [file d4fo01410c1.pdf]

**Individual and interactive effects of monounsaturated fatty acids on their  
associations with hypertension in Chinese residents**

Supplemental tables: 8

Supplemental figure: 2

**Table S1.** Spearman correlations between daily intake levels of individual MUFAs and food categories.

| □               | Grains | Tubers | Soybeans | Vegetables | Fungi  | Fruits | Seeds and nuts | Dairy  | Red meat | Poultry | Fish and seafoods | Eggs   | Oils   |
|-----------------|--------|--------|----------|------------|--------|--------|----------------|--------|----------|---------|-------------------|--------|--------|
| MUFA14          | -0.06  | -0.04  | 0.05     | 0.03       | 0.06   | 0.10   | 0.04           | 0.60   | 0.23     | 0.07    | 0.16              | 0.08   | 0.04   |
| <i>P</i> -value | <0.001 | 0.010  | <0.001   | 0.030      | 0.010  | <0.001 | 0.140          | <0.001 | <0.001   | <0.001  | <0.001            | <0.001 | <0.001 |
| MUFA15          | 0.24   | 0.12   | 0.05     | 0.05       | 0.08   | 0.13   | 0.08           | 0.43   | -0.02    | 0.06    | 0.18              | 0.12   | -0.02  |
| <i>P</i> -value | <0.001 | <0.001 | <0.001   | <0.001     | <0.001 | <0.001 | <0.001         | <0.001 | 0.110    | <0.001  | <0.001            | <0.001 | 0.200  |
| MUFA16          | -0.12  | -0.02  | 0.10     | 0.01       | 0.05   | 0.18   | 0.02           | 0.26   | 0.22     | 0.32    | 0.22              | 0.15   | 0.27   |
| <i>P</i> -value | <0.001 | 0.140  | <0.001   | 0.520      | 0.010  | <0.001 | 0.360          | <0.001 | <0.001   | <0.001  | <0.001            | <0.001 | <0.001 |
| MUFA17          | -0.04  | -0.06  | 0.04     | 0.14       | 0.03   | -0.05  | 0.03           | 0.12   | 0.28     | 0.06    | 0.16              | -0.01  | 0.16   |
| <i>P</i> -value | <0.001 | <0.001 | <0.001   | <0.001     | 0.080  | <0.001 | 0.220          | <0.001 | <0.001   | <0.001  | <0.001            | 0.440  | <0.001 |
| MUFA18          | 0.04   | -0.10  | 0.06     | 0.22       | 0.09   | 0.02   | 0.25           | 0.13   | 0.30     | 0.28    | 0.14              | 0.09   | 0.64   |
| <i>P</i> -value | <0.001 | <0.001 | <0.001   | <0.001     | <0.001 | 0.200  | <0.001         | <0.001 | <0.001   | <0.001  | <0.001            | <0.001 | <0.001 |
| MUFA20          | 0.04   | -0.13  | 0.01     | 0.25       | 0.10   | -0.13  | 0.11           | -0.04  | 0.26     | 0.10    | 0.21              | -0.08  | 0.46   |
| <i>P</i> -value | <0.001 | <0.001 | 0.320    | <0.001     | <0.001 | <0.001 | <0.001         | 0.040  | <0.001   | <0.001  | <0.001            | <0.001 | <0.001 |
| MUFA22          | 0.04   | -0.04  | 0.21     | 0.11       | 0.13   | -0.05  | 0.04           | 0.01   | 0.10     | 0.03    | 0.12              | 0.04   | 0.26   |
| <i>P</i> -value | <0.001 | <0.001 | <0.001   | <0.001     | <0.001 | <0.001 | 0.050          | 0.550  | <0.001   | 0.110   | <0.001            | <0.001 | <0.001 |

The daily intake levels of individual MUFAs were log-transformed. **Abbreviations:** MUFA: monounsaturated fatty acid.

**Table S2.** Eigenvalues of components in principal components analysis using 7 individual MUFAs.

|   | Eigenvalue | Difference | Proportion | Cumulative proportion |
|---|------------|------------|------------|-----------------------|
| 1 | 2.14       | 0.65       | 0.31       | 0.31                  |
| 2 | 1.49       | 0.31       | 0.21       | 0.52                  |
| 3 | 1.18       | 0.31       | 0.17       | 0.69                  |
| 4 | 0.87       | 0.26       | 0.12       | 0.81                  |
| 5 | 0.60       | 0.11       | 0.09       | 0.90                  |
| 6 | 0.49       | 0.24       | 0.07       | 0.97                  |
| 7 | 0.24       | -          | 0.04       | 1.00                  |

The log-transformed intake levels of individual MUFAs were used in the principal components analysis. **Abbreviations:** MUFA: monounsaturated fatty acid.

**Table S3.** Eigenvectors of different individual MUFAs in components.

| □      | Principal components |        |        |        |        |        |        |
|--------|----------------------|--------|--------|--------|--------|--------|--------|
|        | 1                    | 2      | 3      | 4      | 5      | 6      | 7      |
| MUFA14 | 0.372                | 0.427  | 0.325  | 0.002  | -0.505 | -0.565 | -0.013 |
| MUFA15 | 0.250                | 0.551  | 0.358  | 0.208  | 0.150  | 0.656  | -0.095 |
| MUFA16 | 0.432                | 0.168  | -0.489 | 0.258  | 0.480  | -0.289 | -0.407 |
| MUFA17 | 0.407                | -0.012 | 0.129  | -0.774 | 0.389  | -0.022 | 0.258  |
| MUFA18 | 0.468                | -0.074 | -0.519 | 0.126  | -0.389 | 0.289  | 0.506  |
| MUFA20 | 0.398                | -0.549 | 0.178  | -0.107 | -0.297 | 0.228  | -0.597 |
| MUFA22 | 0.263                | -0.423 | 0.457  | 0.514  | 0.319  | -0.176 | 0.383  |

The log-transformed intake levels of individual MUFAs were used in the principal components analysis.

**Abbreviations:** MUFA: monounsaturated fatty acid.

**Table S4.** Linear and nonlinear *P*-values for associations of MUFA15, MUFA17, MUFA18 and MUFA20 with hypertension and BPs in different MUFA subgroups, as well as interactions by MUFA subgroups.

|              |             |           | MUFA15    | MUFA17 | MUFA18 | MUFA20 |       |
|--------------|-------------|-----------|-----------|--------|--------|--------|-------|
| Hypertension |             |           |           |        |        |        |       |
| MUFA15       | high        | linear    | -         | 0.215  | 0.031  | 0.001  |       |
|              |             | nonlinear | -         | 0.382  | 0.044  | 0.086  |       |
|              | low         | linear    | -         | <0.001 | 0.001  | 0.001  |       |
|              |             | nonlinear | -         | 0.039  | 0.001  | 0.001  |       |
|              | interaction | linear    | -         | 0.02   | 0.808  | 0.32   |       |
|              |             | nonlinear | -         | 0.096  | 0.704  | 0.422  |       |
|              | MUFA17      | high      | linear    | <0.001 | -      | 0.103  | 0.001 |
|              |             |           | nonlinear | 0.037  | -      | 0.057  | 0.006 |
| low          |             | linear    | 0.146     | -      | 0.002  | 0.001  |       |
|              |             | nonlinear | 0.068     | -      | 0.006  | <0.001 |       |
| interaction  |             | linear    | <0.001    | -      | 0.982  | 0.015  |       |
|              |             | nonlinear | 0.006     | -      | 0.958  | 0.979  |       |
| MUFA18       |             | high      | linear    | 0.735  | <0.001 | -      | 0.979 |
|              |             |           | nonlinear | 0.662  | 0.429  | -      | 0.869 |
|              | low         | linear    | 0.009     | <0.001 | -      | <0.001 |       |
|              |             | nonlinear | 0.928     | 0.532  | -      | <0.001 |       |
|              | interaction | linear    | 0.268     | 0.893  | -      | 0.038  |       |
|              |             | nonlinear | 0.764     | 0.89   | -      | 0.03   |       |
|              | MUFA20      | high      | linear    | 0.534  | <0.001 | 0.044  | -     |
|              |             |           | nonlinear | 0.942  | 0.635  | 0.021  | -     |
| low          |             | linear    | 0.07      | <0.001 | <0.001 | -      |       |
|              |             | nonlinear | 0.72      | 0.088  | 0.523  | -      |       |
| interaction  |             | linear    | 0.74      | 0.49   | 0.038  | -      |       |
|              |             | nonlinear | 0.751     | 0.329  | 0.417  | -      |       |
| SBP          |             |           |           |        |        |        |       |
| MUFA15       |             | high      | linear    | -      | 0.001  | 0.11   | 0.11  |
|              | nonlinear   |           | -         | 0.466  | 0.166  | 0.601  |       |
|              | low         | linear    | -         | <0.001 | 0.199  | 0.014  |       |
|              |             | nonlinear | -         | 0.168  | 0.125  | 0.076  |       |
|              | interaction | linear    | -         | 0.243  | 0.092  | 0.655  |       |
|              |             | nonlinear | -         | 0.509  | 0.774  | 0.558  |       |
|              | MUFA17      | high      | linear    | 0.005  | -      | 0.467  | 0.203 |
|              |             |           | nonlinear | 0.083  | -      | 0.269  | 0.253 |
| low          |             | linear    | 0.002     | -      | 0.747  | 0.484  |       |
|              |             | nonlinear | 0.781     | -      | 0.684  | 0.404  |       |
| interaction  |             | linear    | 0.306     | -      | 0.667  | 0.9    |       |
|              |             | nonlinear | 0.124     | -      | 0.481  | 0.851  |       |
| MUFA18       |             | high      | linear    | 0.465  | 0.028  | -      | 0.716 |
|              |             |           | nonlinear | 0.542  | 0.333  | -      | 0.693 |
|              | low         | linear    | <0.001    | <0.001 | -      | 0.005  |       |
|              |             | nonlinear | 0.781     | 0.141  | -      | 0.479  |       |
|              | interaction | linear    | 0.054     | 0.041  | -      | 0.216  |       |
|              |             | nonlinear | 0.92      | 0.144  | -      | 0.284  |       |
|              | MUFA20      | high      | linear    | 0.009  | 0.013  | 0.721  | -     |
|              |             |           | nonlinear | 0.034  | 0.472  | 0.58   | -     |

|  |             |           |        |        |        |        |
|--|-------------|-----------|--------|--------|--------|--------|
|  | low         | linear    | 0.003  | <0.001 | 0.071  | -      |
|  |             | nonlinear | 0.419  | 0.34   | 0.412  | -      |
|  | interaction | linear    | 0.084  | 0.426  | 0.208  | -      |
|  |             | nonlinear | 0.03   | 0.744  | 0.793  | -      |
|  |             |           | DBP    |        |        |        |
|  | high        | linear    | -      | <0.001 | 0.013  | <0.001 |
|  |             | nonlinear | -      | 0.657  | 0.622  | 0.302  |
|  | low         | linear    | -      | <0.001 | 0.033  | <0.001 |
|  |             | nonlinear | -      | 0.006  | 0.016  | <0.001 |
|  | interaction | linear    | -      | 0.37   | 0.01   | 0.007  |
|  |             | nonlinear | -      | 0.189  | 0.33   | 0.126  |
|  | high        | linear    | <0.001 | -      | 0.388  | <0.001 |
|  |             | nonlinear | 0.053  | -      | 0.181  | <0.001 |
|  | low         | linear    | 0.017  | -      | 0.36   | <0.001 |
|  |             | nonlinear | 0.52   | -      | 0.843  | 0.455  |
|  | interaction | linear    | 0.037  | -      | 0.124  | 0.075  |
|  |             | nonlinear | 0.309  | -      | 0.262  | 0.027  |
|  | high        | linear    | 0.125  | 0.002  | -      | 0.022  |
|  |             | nonlinear | 0.716  | 0.232  | -      | 0.259  |
|  | low         | linear    | <0.001 | <0.001 | -      | <0.001 |
|  |             | nonlinear | 0.032  | 0.232  | -      | 0.351  |
|  | interaction | linear    | 0.01   | 0.001  | -      | 0.034  |
|  |             | nonlinear | 0.056  | 0.123  | -      | 0.919  |
|  | high        | linear    | 0.041  | <0.001 | 0.044  | -      |
|  |             | nonlinear | 0.209  | 0.69   | 0.763  | -      |
|  | low         | linear    | <0.001 | <0.001 | <0.001 | -      |
|  |             | nonlinear | 0.427  | 0.267  | 0.978  | -      |
|  | interaction | linear    | 0.191  | 0.436  | <0.001 | -      |
|  |             | nonlinear | 0.633  | 0.202  | 0.953  | -      |

Log-transformed daily intake levels of MUFAs were used, and regression models were adjusted for age, gender, physical activity, smoking, alcohol drinking, as well as intakes of carbohydrate, fat, protein, and sodium. Participants were those without any anti-hypertensive treatment for associations between MUFAs and BPs. Abbreviations: MUFA: monounsaturated fatty acid; SBP: systolic blood pressure; DBP: diastolic blood pressure.

**Table S5.** Associations of daily MUFAs intakes with BMI and WC.

| □      | BMI                  |                 | WC                   |                 |
|--------|----------------------|-----------------|----------------------|-----------------|
|        | Coefficient (95%CI)  | <i>P</i> -value | Coefficient (95%CI)  | <i>P</i> -value |
| MUFA15 | 0.15 (0.05, 0.25)    | 0.003           | 0.47 (0.24, 0.71)    | <0.001          |
| MUFA17 | -0.29 (-0.37, -0.20) | <0.001          | -0.97 (-1.17, -0.76) | <0.001          |
| MUFA18 | -0.00 (-0.10, 0.09)  | 0.967           | -0.11 (-0.34, 0.12)  | 0.360           |
| MUFA20 | -0.24 (-0.33, -0.16) | <0.001          | -0.80 (-1.01, -0.60) | <0.001          |

Regression models were adjusted for age, gender, physical activity, smoking, alcohol drinking, as well as intakes of carbohydrate, fat, protein. **Abbreviations:** MUFA: monounsaturated fatty acid; BMI: body mass index; WC: waist circumference; 95% CI: 95% confidence interval.

**Table S6.** Associations of BMI and WC with hypertension and BPs.

| □   | Hypertension      |                 | SBP (mmHg)          |                 | DBP (mmHg)          |                 |
|-----|-------------------|-----------------|---------------------|-----------------|---------------------|-----------------|
|     | HR (95%CI)        | <i>P</i> -value | Coefficient (95%CI) | <i>P</i> -value | Coefficient (95%CI) | <i>P</i> -value |
| BMI | 1.09 (1.08, 1.10) | <0.001          | 0.70 (0.61, 0.79)   | <0.001          | 0.55 (0.49, 0.61)   | <0.001          |
| WC  | 1.04 (1.03, 1.04) | <0.001          | 0.35 (0.31, 0.39)   | <0.001          | 0.27 (0.24, 0.30)   | <0.001          |

Regression models were adjusted for age, gender, physical activity, smoking, alcohol drinking, as well as intakes of carbohydrate, fat, protein and sodium. **Abbreviations:** BMI: body mass index; WC: waist circumference; SBP: systolic blood pressure; DBP: diastolic blood pressure; HR: hazard ratio; 95% CI: 95% confidence interval.



**Table S7.** Mediation effects of obesity estimated by anthropometric measurements on the association between MUFAs and SBP.

| □      | ACME (95%CI)         | ADE (95%CI)          | Total effect (95%CI) | Prop. Mediated (95%CI) | P-value |
|--------|----------------------|----------------------|----------------------|------------------------|---------|
| BMI    |                      |                      |                      |                        |         |
| MUFA15 | 0.12 (0.05, 0.20)    | 0.53 (0.21, 0.86)    | 0.65 (0.32, 0.99)    | 0.18 (0.08, 0.39)      | 0.002   |
| MUFA17 | -0.19 (-0.25, -0.12) | -0.50 (-0.77, -0.25) | -0.69 (-0.97, -0.43) | 0.27 (0.17, 0.44)      | <0.001  |
| MUFA18 | 0.05 (-0.13, 0.24)   | -0.72 (-1.49, 0.02)  | -0.67 (-1.45, 0.10)  | -0.06 (-1.18, 0.80)    | 0.688   |
| MUFA20 | -0.19 (-0.26, -0.12) | -0.49 (-0.75, -0.20) | -0.68 (-0.94, -0.38) | 0.28 (0.17, 0.49)      | <0.001  |
| WC     |                      |                      |                      |                        |         |
| MUFA15 | 0.14 (0.06, 0.22)    | 0.51 (0.18, 0.87)    | 0.65 (0.31, 1.02)    | 0.21 (0.09, 0.44)      | <0.001  |
| MUFA17 | -0.22 (-0.29, -0.15) | -0.47 (-0.74, -0.20) | -0.69 (-0.96, -0.40) | 0.31 (0.21, 0.53)      | <0.001  |
| MUFA18 | -0.05 (-0.23, 0.15)  | -0.65 (-1.44, 0.09)  | -0.69 (-1.50, 0.06)  | 0.06 (-0.63, 0.65)     | 0.640   |
| MUFA20 | -0.18 (-0.26, -0.11) | -0.49 (-0.78, -0.18) | -0.67 (-0.97, -0.36) | 0.27 (0.16, 0.51)      | <0.001  |

Regression models were adjusted for age, gender, physical activity, smoking, alcohol drinking, as well as intakes of carbohydrate, fat, protein, and sodium. Mediation analyses were performed in participants without any anti-hypertensive treatment. **Abbreviations:** MUFA: monounsaturated fatty acid; SBP: systolic blood pressure; ACME: average causal mediation effect; ADE: average direct effect; Prop. Mediated: proportion of mediation effect; 95% CI: 95% confidence interval.

**Table S8.** Mediation effects of obesity estimated by anthropometric measurements on the association between MUFAs and DBP.

| □      | ACME (95%CI)         | ADE (95%CI)          | Total effect (95%CI) | Prop. Mediated (95%CI) | P-value |
|--------|----------------------|----------------------|----------------------|------------------------|---------|
| BMI    |                      |                      |                      |                        |         |
| MUFA15 | 0.10 (0.04, 0.16)    | 0.51 (0.29, 0.73)    | 0.61 (0.37, 0.83)    | 0.16 (0.07, 0.29)      | <0.001  |
| MUFA17 | -0.15 (-0.20, -0.10) | -0.49 (-0.67, -0.29) | -0.64 (-0.83, -0.43) | 0.24 (0.15, 0.36)      | <0.001  |
| MUFA18 | 0.04 (-0.11, 0.20)   | -0.80 (-1.37, -0.24) | -0.75 (-1.35, -0.15) | -0.05 (-0.53, 0.15)    | 0.606   |
| MUFA20 | -0.15 (-0.20, -0.10) | -0.75 (-0.94, -0.56) | -0.90 (-1.09, -0.70) | 0.17 (0.11, 0.23)      | <0.001  |
| WC     |                      |                      |                      |                        |         |
| MUFA15 | 0.11 (0.04, 0.17)    | 0.50 (0.27, 0.73)    | 0.61 (0.37, 0.84)    | 0.18 (0.07, 0.31)      | <0.001  |
| MUFA17 | -0.16 (-0.22, -0.11) | -0.47 (-0.65, -0.29) | -0.63 (-0.82, -0.44) | 0.26 (0.17, 0.37)      | <0.001  |
| MUFA18 | -0.04 (-0.18, 0.12)  | -0.71 (-1.22, -0.18) | -0.75 (-1.30, -0.18) | 0.06 (-0.23, 0.31)     | 0.554   |
| MUFA20 | -0.14 (-0.19, -0.09) | -0.76 (-0.95, -0.58) | -0.90 (-1.10, -0.71) | 0.16 (0.09, 0.22)      | <0.001  |

Regression models were adjusted for age, gender, physical activity, smoking, alcohol drinking, as well as intakes of carbohydrate, fat, protein, and sodium. Mediation analyses were performed in participants without any anti-hypertensive treatment. **Abbreviations:** MUFA: monounsaturated fatty acid; DBP: diastolic blood pressure; ACME: average causal mediation effect; ADE: average direct effect; Prop. Mediated: proportion of mediation effect; 95% CI: 95% confidence interval.

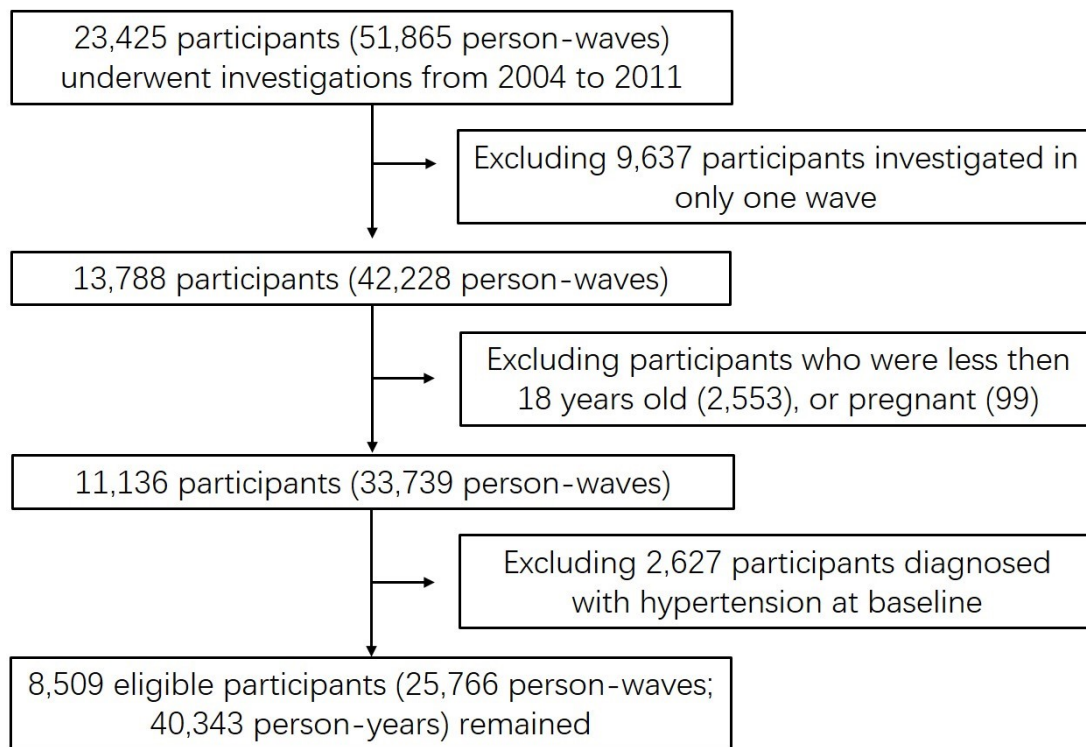

**Figure S1.** Flow chart of current study.

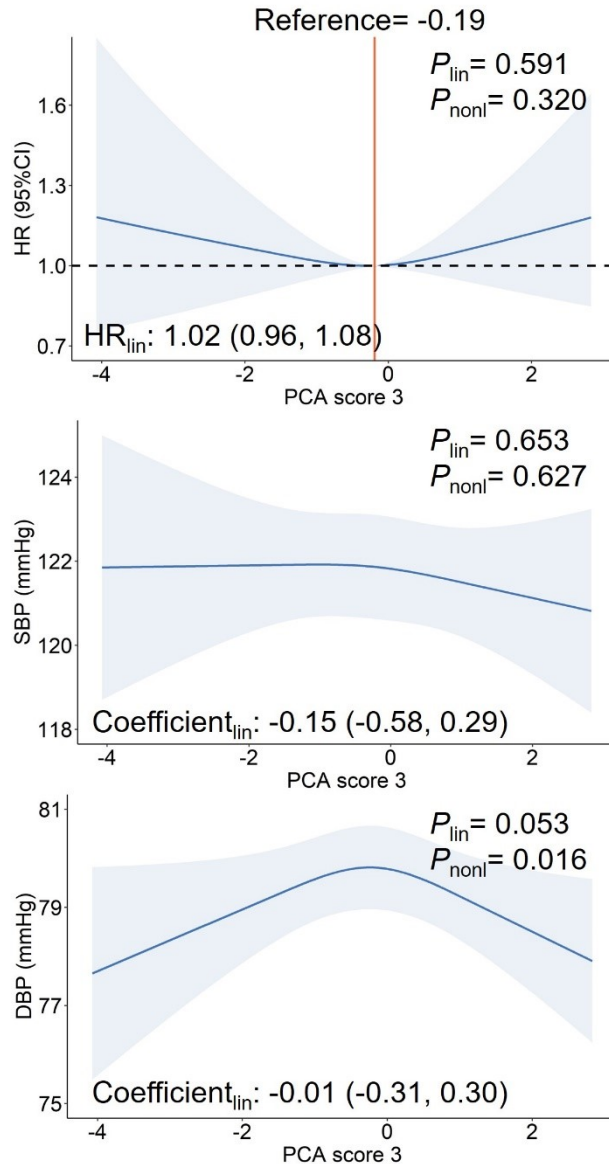

**Figure S2.** The associations of PCA score 3 with hypertension and BPs. PCA score 3 were calculated based on both z-scores of log-transformed MUFAs and eigenvectors. Regression models were adjusted for age, gender, physical activity, smoking, alcohol drinking, as well as intakes of carbohydrate, fat, protein, and sodium. BP-related analyses were performed in participants without any anti-hypertensive treatment. Abbreviations: MUFA: monounsaturated fatty acid; SBP: systolic blood pressure; DBP: diastolic blood pressure; HR: hazard ratio; 95%CI: 95% confidence interval;  $P_{lin}$ :  $P$ -value for linearity;  $P_{nonl}$ :  $P$ -value for nonlinearity;  $HR_{lin}$ : hazard ratio for linearity;  $Coefficient_{lin}$ : regression coefficient for linearity.
